# Supplementary material for: Lanthanide–tungstobismuthate clusters based on [BiW9O33]9− building units: synthesis, crystal structures, luminescent and magnetic properties
Source: Royal Society of Chemistry journal article supplement (doi:10.1039/c2dt11478j), 2012-01-01
Supplement: c2dt11478j.pdf [file c2dt11478j.pdf]

## Supporting Information

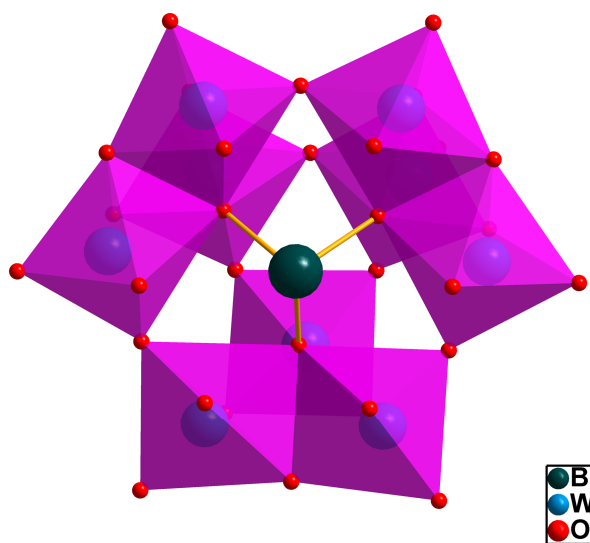

**Figure S1.** The structure of the  $[\text{BiW}_9\text{O}_{33}]^{9-}$  polyanion in **1**. Colour codes: Bi (ultramarine),  $\{\text{WO}_6\}$  octahedra (pink), O (red).

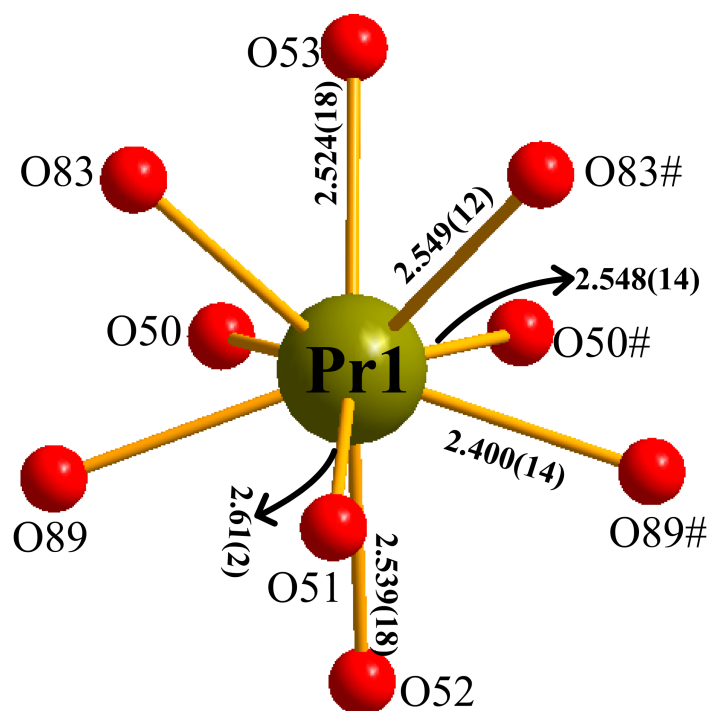

**Figure S2.** The structure of the monocapped square antiprismatic of Pr1 atom in **1**: Pr1 atom is at the center of the monocapped square antiprismatic, and the lengths of Pr–O. Four oxygen atoms (O83, O83#, O89, O89#) from two {BiW<sub>9</sub>} units, two oxygen atoms (O50, O50#) of the carbonate anion, two coordinated water molecules (O51, O52),  $\mu_2$ -O (O53) atom. Symmetry code: # = x, -y, z.

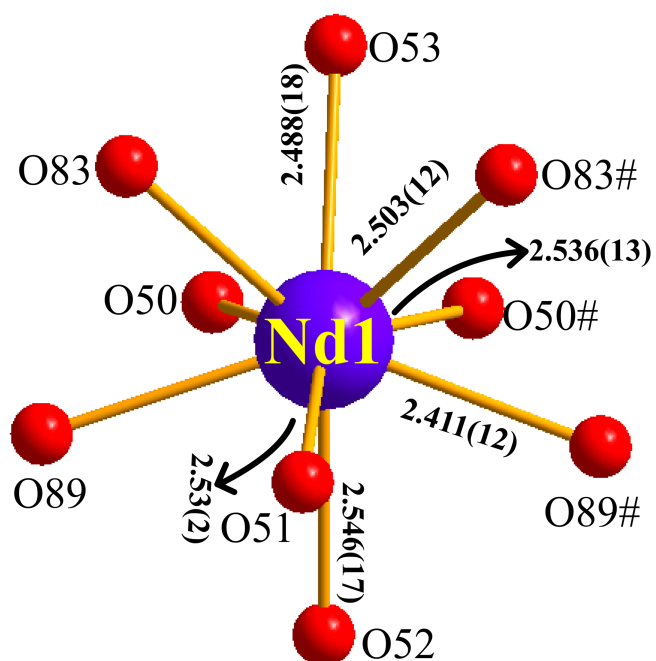

**Figure S3.** The structure of the monocapped square antiprismatic of Nd1 atom in **2**: Nd1 atom is at the center of the monocapped square antiprismatic, and the lengths of Nd–O. four oxygen atoms (O83, O83#, O89, O89#) coming from two {BiW<sub>9</sub>} units, two oxygen atoms (O50, O50#) of the carbonate anion, two coordinated water molecules (O51, O52),  $\mu_2$ -O (O53) atom. Symmetry code: # = x, -y, z.

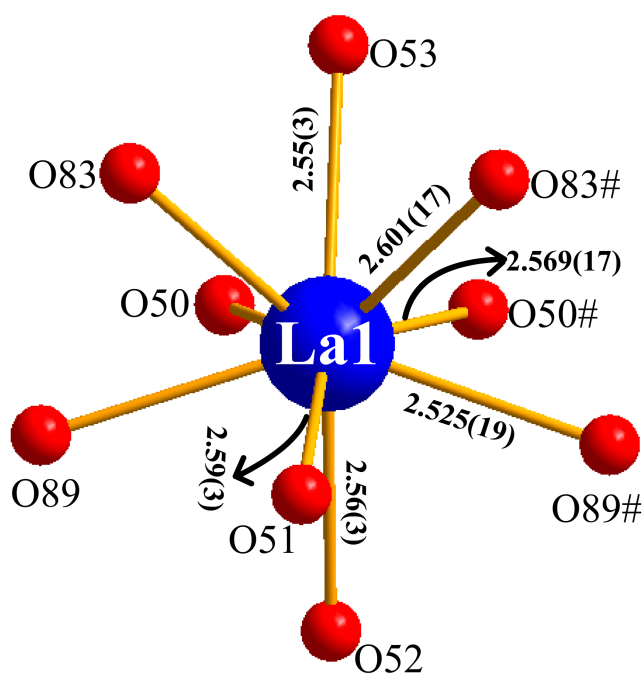

**Figure S4.** The structure of the monocapped square antiprismatic of La1 atom in **3**: La1 atom is at the center of the monocapped square antiprismatic, and the lengths of La–O. four oxygen atoms (O83, O83#, O89, O89#) coming from two {BiW<sub>9</sub>} units, two oxygen atoms (O50, O50#) of the carbonate anion, two coordinated water molecules (O51, O52),  $\mu_2$ -O (O53) atom. Symmetry code: # = x, -y, z.

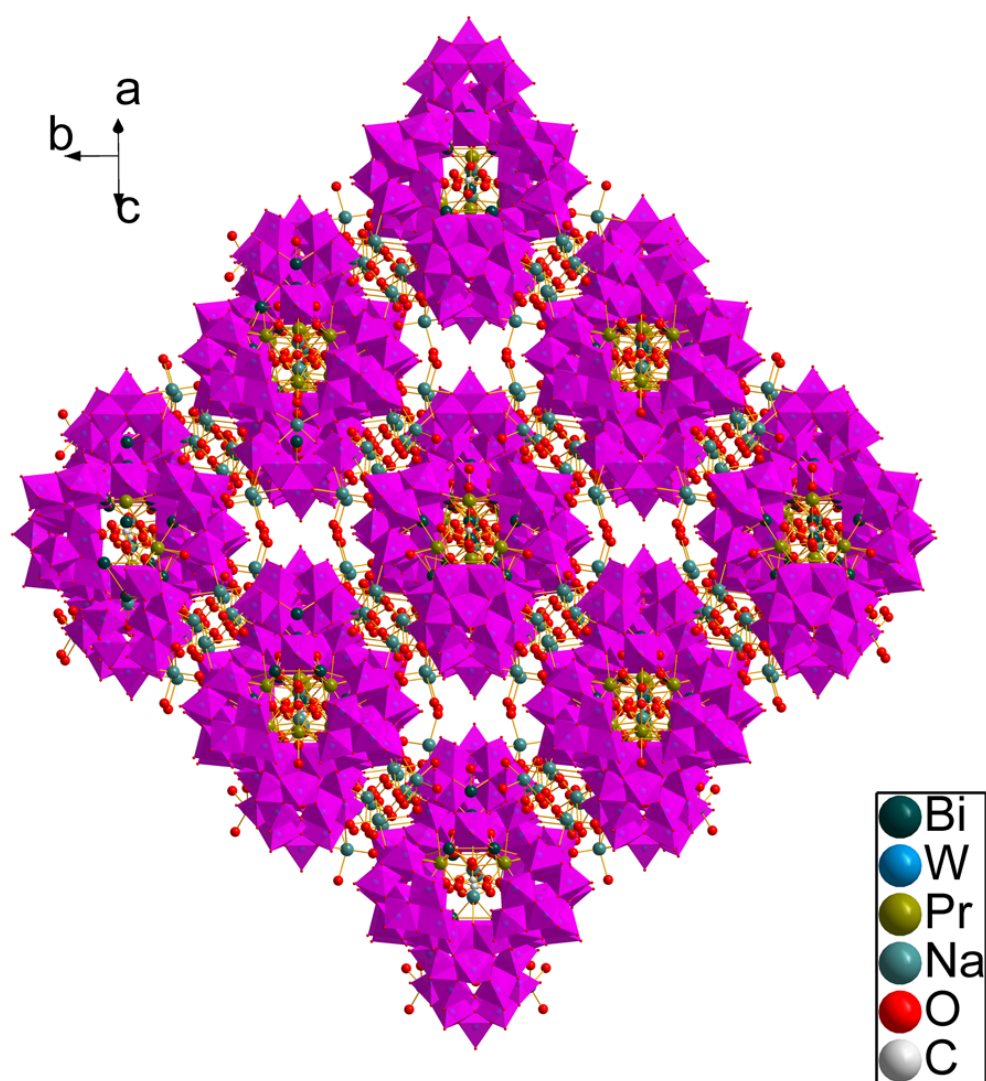

**Figure S5.** 3-D packing arrangement of **1**. All the isolated water molecules are omitted for clarity.

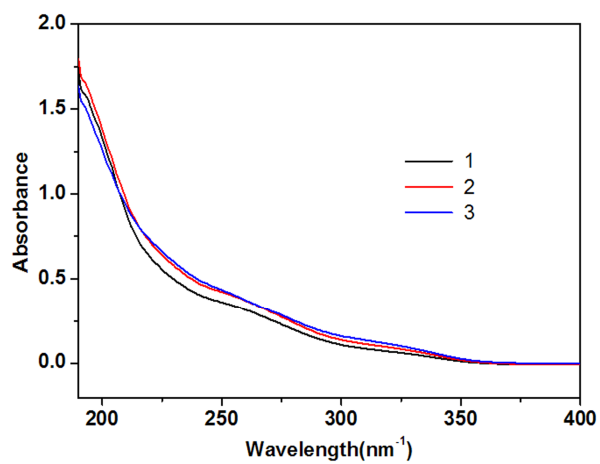

**Figure S6.** UV spectra of compounds **1**, **2** and **3** in aqueous solution.

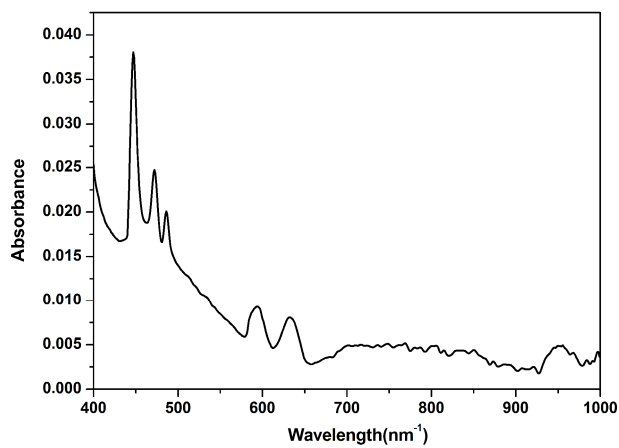

**Figure S7.** Visible spectra of compounds **1** in aqueous solution.

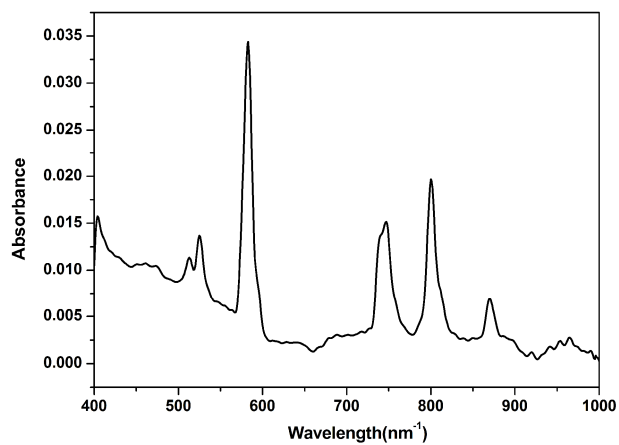

**Figure S8.** Visible spectra of compounds **2** in aqueous solution.

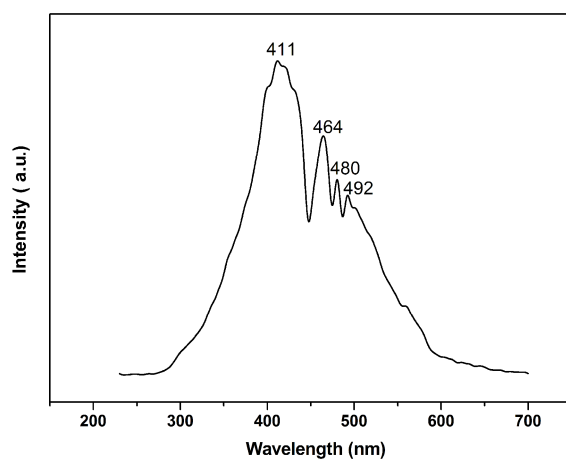

**Figure S9.** The emission spectrum of compound **1** excited at 230 nm

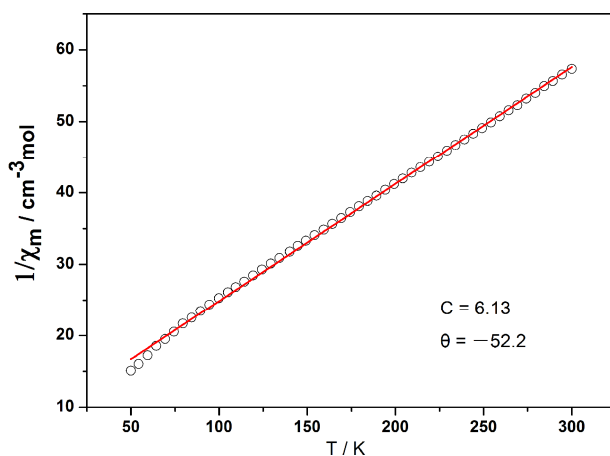

**Figure. S10.** Temperature dependence of  $\chi_m^{-1}$  for **1** at 50–300 K. The solid line is the fit of Curie-Weiss law.

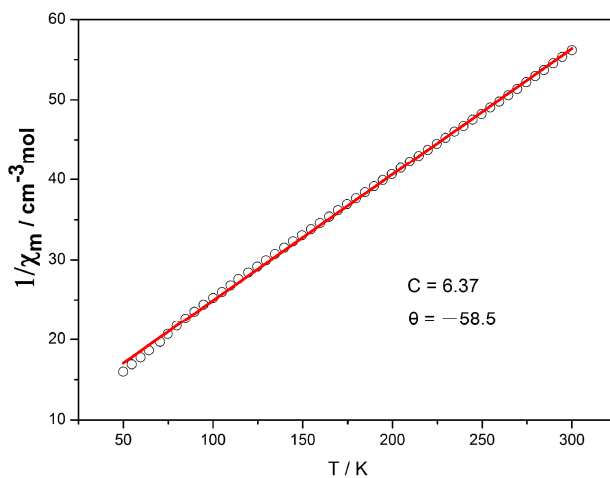

**Fig. S11.** Temperature dependence of  $\chi_m^{-1}$  for **2** at 50–300 K. The solid line is the fit of Curie-Weiss law.

The  $1/\chi_m$  versus  $T$  plots for complexes **1** and **2** (Figure. S10 and S11) obey the Curie-Weiss law [ $\chi = C/(T-\theta)$ ] from 50 to 300 K with  $C = 6.13 \text{ cm}^3 \text{ mol}^{-1} \text{ K}$ ,  $\theta = -52.2 \text{ K}$  and  $C = 6.37 \text{ cm}^3 \text{ mol}^{-1} \text{ K}$ ,  $\theta = -58.5 \text{ K}$ , respectively. The negative value of  $\theta$  may be indicative of the weak antiferromagnetic interaction between the neighboring lanthanide ions for **1** and **2**.



### IR spectroscopy

The IR spectrum of **1** (Figure. S12) is very similar to the trivalent lacunary  $\alpha$ -B-[BiW<sub>9</sub>O<sub>33</sub>]<sup>9-</sup>. The characteristic peaks of the different W-O bonds are found as follows: 942 cm<sup>-1</sup> for  $\nu$ (W-O<sub>d</sub>); 892 cm<sup>-1</sup> for  $\nu$ (W-O<sub>c</sub>); 778 and 730 cm<sup>-1</sup> for  $\nu$ (W-O<sub>b</sub>). The characteristic peak at 848 cm<sup>-1</sup> is attributed to the  $\nu$ (Bi-O<sub>a</sub>).<sup>1</sup> The characteristic peak at the 1456 cm<sup>-1</sup> is attributed to  $\nu_3$  vibration band of CO<sub>3</sub><sup>2-</sup> group. A broad band at 3426 cm<sup>-1</sup> associates with the aqua ligands. The peak at 1619 cm<sup>-1</sup> is due to the crystalline lattice water molecules. The IR spectra of complexes **2** and **3** (as shown in Figure 4) are similar to that of complex **1**.

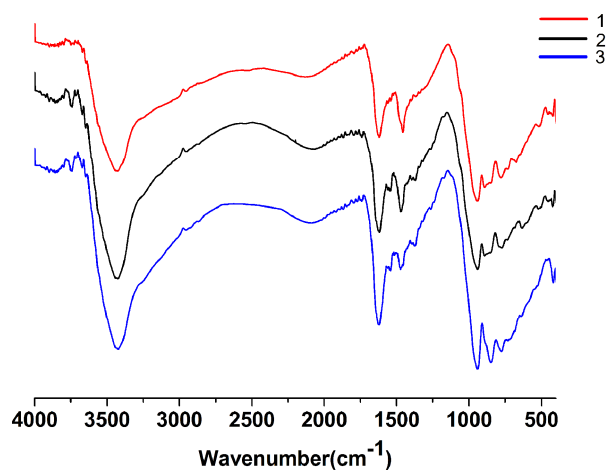

**Figure S12.** IR spectra of compounds **1**, **2** and **3**.

### Reference:

(1) D. Rusu, C. Crăciun, A. L. Barra, L. David, M. Rusu, C. Roușu, O. Cozar and G. Marcu, *J. Chem. Soc., Dalton Trans.*, 2001, 2879;

### Thermogravimetric analysis

The thermal gravimetric (TGA) analysis curves of **1**, **2** and **3** show two mass loss regions below 600°C (Figure S13-S15). The first, the TGA curves of **1**, **2** and **3** show weight loss of 10.9%, 10.31% and 8.62% in the range of 41-315°C, 36-314°C and 16-318°C, which are assigned to lattice water loss equal to 95, 91 and 73 molecules for **1**, **2**, and **3**, respectively. The crystal structure of the compound **1**, **2** and **3** may be stabilized by the intermolecular O–H···O hydrogen bonds in lattice water molecules.<sup>1</sup> In the second region, the TGA curves of **1**, **2** and **3** show weight loss of 1.57%, 1.39% and 1.36% in the range of 315-365°C, 314-375°C, 316-378°C, which are assigned to the loss of 6 coordinated water molecules and 3 hydroxyls of  $[\{\text{Bi}_6(\mu_3\text{-O})_4(\mu_2\text{-OH})_3\}]^{7+}$  due to inter molecular condensation.<sup>2</sup> The TGA plots of **1**, **2** and **3** indicate that the complexes are thermally stable up to about 315°C.

### Reference:

- (1) A. Dziwulska-Kułaczkowska, L. Mazur and W. Ferenc, *J. Therm. Anal. Calorim.* 2009, **96**, 255.
- (2) D. L. Rogow, H. H. Fei, D. P. Brennan, M. Ikehata, P. Y. Zavalij, A. G. Oliver and S. R. J. Oliver, *Inorg. Chem.* 2010, **49**, 5619;

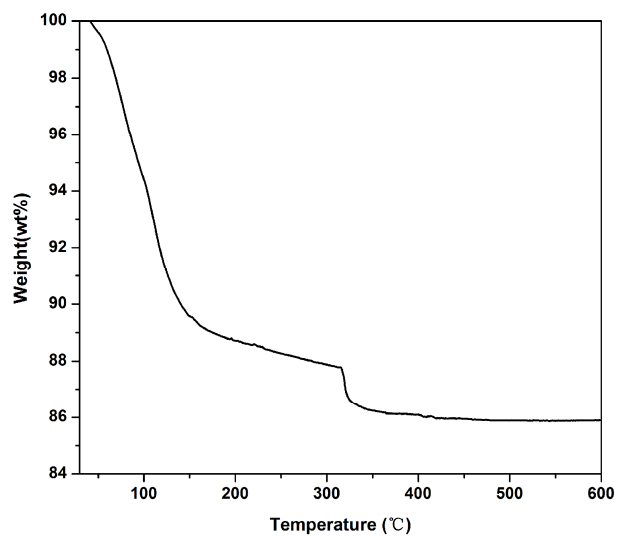

**Figure S13.** The TG curve of **1**.

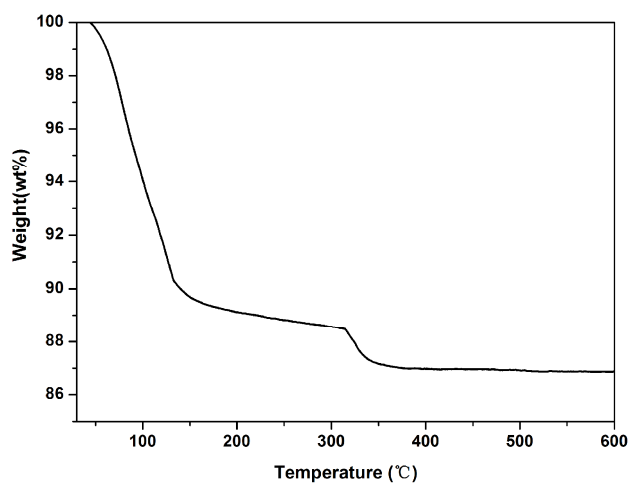

**Figure S14.** The TG curve of **2**.

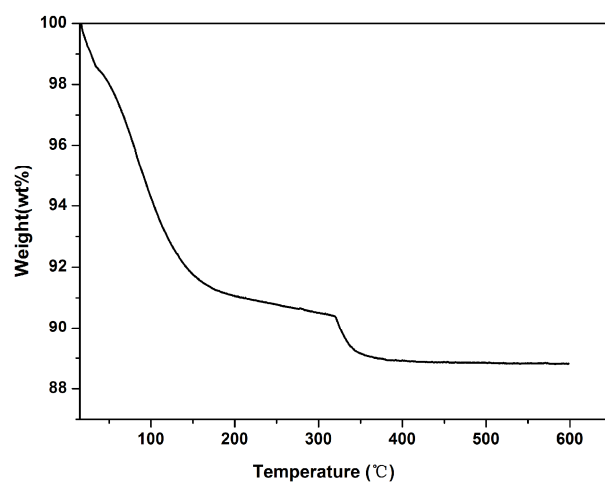

**Figure S15.** The TG curve of **3**.

Table S1. Selected bond lengths [Å] and bond angles (°) for the compound **1**.

|                     |           |               |           |
|---------------------|-----------|---------------|-----------|
| Bi(1)-O(33)         | 2.122(16) | W(9)-O(60)    | 1.924(18) |
| Bi(1)-O(32)#1       | 2.129(13) | W(9)-O(57)    | 2.032(15) |
| Bi(1)-O(32)         | 2.129(13) | W(9)-O(32)    | 2.278(13) |
| Bi(2)-O(53)         | 2.162(18) | W(10)-O(26)   | 1.78(2)   |
| Bi(2)-O(84)         | 2.188(17) | W(10)-O(25)   | 1.800(15) |
| Bi(2)-O(85)#1       | 2.361(12) | W(10)-O(25)#1 | 1.800(15) |
| Bi(2)-O(85)         | 2.361(12) | W(10)-O(27)#1 | 2.041(14) |
| Bi(2)-O(83)         | 2.653(12) | W(10)-O(27)   | 2.041(14) |
| Bi(2)-O(83)#1       | 2.653(12) | W(10)-O(28)   | 2.349(18) |
| Bi(4)-O(84)         | 2.129(9)  | W(15)-O(30)   | 1.742(15) |
| Bi(4)-O(55)         | 2.186(12) | W(15)-O(27)   | 1.821(15) |
| Bi(4)-O(28)         | 2.367(12) | W(15)-O(57)   | 1.927(15) |
| Bi(4)-O(25)         | 2.375(14) | W(15)-O(31)   | 1.942(15) |
| Bi(4)-O(85)         | 2.553(12) | W(15)-O(29)   | 1.945(5)  |
| Bi(4)-O(78)         | 2.685(13) | W(15)-O(32)   | 2.275(11) |
| Bi(5)-O(55)         | 2.101(12) | W(17)-O(37)   | 1.729(17) |
| Bi(5)-O(55)#1       | 2.101(12) | W(17)-O(40)   | 1.745(15) |
| Bi(5)-O(28)         | 2.212(18) | W(17)-O(36)   | 1.950(15) |
| Bi(5)-O(56)#1       | 2.743(14) | W(17)-O(38)   | 1.962(10) |
| Bi(5)-O(56)         | 2.743(14) | W(17)-O(41)#1 | 2.027(15) |
| Bi(7)-O(43)         | 2.125(13) | W(17)-O(33)   | 2.224(12) |
| Bi(7)-O(55)         | 2.187(12) | Pr(1)-O(89)   | 2.400(14) |
| Bi(7)-O(78)         | 2.336(13) | Pr(1)-O(89)#1 | 2.400(14) |
| Bi(7)-O(56)         | 2.339(14) | Pr(1)-O(53)   | 2.524(18) |
| Bi(7)-O(44)         | 2.612(14) | Pr(1)-O(52)   | 2.539(18) |
| Bi(7)-O(42)         | 2.752(12) | Pr(1)-O(50)#1 | 2.548(14) |
| W(7)-O(34)          | 1.722(15) | Pr(1)-O(50)   | 2.548(14) |
| W(7)-O(35)          | 1.748(16) | Pr(1)-O(83)   | 2.549(12) |
| W(7)-O(36)          | 1.907(14) | Pr(1)-O(83)#1 | 2.549(12) |
| W(7)-O(31)          | 1.956(16) | Pr(1)-O(51)   | 2.61(2)   |
| W(7)-O(61)          | 2.078(16) | Pr(2)-O(45)   | 2.462(14) |
| W(7)-O(32)          | 2.200(13) | Pr(2)-O(46)   | 2.483(15) |
| W(8)-O(62)          | 1.68(3)   | Pr(2)-O(49)   | 2.549(3)  |
| W(8)-O(41)#1        | 1.874(13) | Pr(2)-O(42)   | 2.560(14) |
| W(8)-O(41)          | 1.874(13) | Pr(2)-O(43)   | 2.564(12) |
| W(8)-O(60)#1        | 1.907(18) | Pr(2)-O(50)   | 2.568(14) |
| W(8)-O(60)          | 1.907(18) | Pr(2)-O(48)   | 2.572(14) |
| W(8)-O(33)          | 2.352(18) | Pr(2)-O(44)   | 2.588(13) |
| W(9)-O(59)          | 1.698(15) | Pr(2)-O(47)   | 2.600(14) |
| W(9)-O(61)          | 1.897(16) | O(49)-C(1)    | 1.27(3)   |
| W(9)-O(58)          | 1.907(5)  | O(50)-C(1)    | 1.29(2)   |
| O(33)-Bi(1)-O(32)#1 | 85.8(5)   |               |           |

|                       |          |                      |           |
|-----------------------|----------|----------------------|-----------|
| O(33)-Bi(1)-O(32)     | 85.8(5)  | O(43)-Bi(7)-O(78)    | 88.4(5)   |
| O(32)#1-Bi(1)-O(32)   | 85.8(7)  | O(55)-Bi(7)-O(78)    | 72.9(4)   |
| O(53)-Bi(2)-O(84)     | 83.5(7)  | O(43)-Bi(7)-O(56)    | 91.6(5)   |
| O(53)-Bi(2)-O(85)#1   | 87.7(4)  | O(55)-Bi(7)-O(56)    | 71.4(5)   |
| O(84)-Bi(2)-O(85)#1   | 70.1(3)  | O(78)-Bi(7)-O(56)    | 144.1(5)  |
| O(53)-Bi(2)-O(85)     | 87.7(4)  | O(43)-Bi(7)-O(44)    | 72.0(4)   |
| O(84)-Bi(2)-O(85)     | 70.1(3)  | O(55)-Bi(7)-O(44)    | 137.5(4)  |
| O(85)#1-Bi(2)-O(85)   | 140.1(6) | O(78)-Bi(7)-O(44)    | 138.0(4)  |
| O(53)-Bi(2)-O(83)     | 70.8(5)  | O(56)-Bi(7)-O(44)    | 75.0(4)   |
| O(84)-Bi(2)-O(83)     | 134.7(4) | O(43)-Bi(7)-O(42)    | 72.3(5)   |
| O(85)#1-Bi(2)-O(83)   | 141.7(4) | O(55)-Bi(7)-O(42)    | 135.4(4)  |
| O(85)-Bi(2)-O(83)     | 72.2(4)  | O(78)-Bi(7)-O(42)    | 69.6(4)   |
| O(53)-Bi(2)-O(83)#1   | 70.8(5)  | O(56)-Bi(7)-O(42)    | 143.7(4)  |
| O(84)-Bi(2)-O(83)#1   | 134.7(4) | O(44)-Bi(7)-O(42)    | 69.2(4)   |
| O(85)#1-Bi(2)-O(83)#1 | 72.2(4)  | O(34)-W(7)-O(35)     | 104.5(8)  |
| O(85)-Bi(2)-O(83)#1   | 141.7(4) | O(34)-W(7)-O(36)     | 91.9(6)   |
| O(83)-Bi(2)-O(83)#1   | 70.9(5)  | O(35)-W(7)-O(36)     | 100.5(6)  |
| O(84)-Bi(4)-O(55)     | 90.7(6)  | O(34)-W(7)-O(31)     | 93.4(6)   |
| O(84)-Bi(4)-O(28)     | 73.1(5)  | O(35)-W(7)-O(31)     | 96.7(6)   |
| O(55)-Bi(4)-O(28)     | 72.1(5)  | O(36)-W(7)-O(31)     | 160.2(6)  |
| O(84)-Bi(4)-O(25)     | 92.3(7)  | O(34)-W(7)-O(61)     | 159.6(6)  |
| O(55)-Bi(4)-O(25)     | 138.5(4) | O(35)-W(7)-O(61)     | 95.8(7)   |
| O(28)-Bi(4)-O(25)     | 69.3(6)  | O(36)-W(7)-O(61)     | 85.1(6)   |
| O(84)-Bi(4)-O(85)     | 67.2(5)  | O(31)-W(7)-O(61)     | 83.4(6)   |
| O(55)-Bi(4)-O(85)     | 110.9(4) | O(34)-W(7)-O(32)     | 87.4(6)   |
| O(28)-Bi(4)-O(85)     | 140.1(4) | O(35)-W(7)-O(32)     | 165.6(7)  |
| O(25)-Bi(4)-O(85)     | 108.3(4) | O(36)-W(7)-O(32)     | 86.9(5)   |
| O(84)-Bi(4)-O(78)     | 110.7(6) | O(31)-W(7)-O(32)     | 74.3(5)   |
| O(55)-Bi(4)-O(78)     | 66.1(4)  | O(61)-W(7)-O(32)     | 72.3(5)   |
| O(28)-Bi(4)-O(78)     | 138.0(5) | O(62)-W(8)-O(41)#1   | 104.7(7)  |
| O(25)-Bi(4)-O(78)     | 147.6(5) | O(62)-W(8)-O(41)     | 104.7(7)  |
| O(85)-Bi(4)-O(78)     | 63.8(4)  | O(41)#1-W(8)-O(41)   | 99.4(9)   |
| O(55)-Bi(5)-O(55)#1   | 89.3(7)  | O(62)-W(8)-O(60)#1   | 96.9(8)   |
| O(55)-Bi(5)-O(28)     | 77.0(5)  | O(41)#1-W(8)-O(60)#1 | 156.1(7)  |
| O(55)#1-Bi(5)-O(28)   | 77.0(5)  | O(41)-W(8)-O(60)#1   | 84.5(7)   |
| O(55)-Bi(5)-O(56)#1   | 105.5(4) | O(62)-W(8)-O(60)     | 96.9(8)   |
| O(55)#1-Bi(5)-O(56)#1 | 64.6(4)  | O(41)#1-W(8)-O(60)   | 84.5(7)   |
| O(28)-Bi(5)-O(56)#1   | 141.4(4) | O(41)-W(8)-O(60)     | 156.1(7)  |
| O(55)-Bi(5)-O(56)     | 64.6(4)  | O(60)#1-W(8)-O(60)   | 82.9(11)  |
| O(55)#1-Bi(5)-O(56)   | 105.5(4) | O(62)-W(8)-O(33)     | 176.1(10) |
| O(28)-Bi(5)-O(56)     | 141.4(4) | O(41)#1-W(8)-O(33)   | 72.9(5)   |
| O(56)#1-Bi(5)-O(56)   | 59.3(6)  | O(41)-W(8)-O(33)     | 72.9(5)   |
| O(43)-Bi(7)-O(55)     | 83.5(5)  | O(60)#1-W(8)-O(33)   | 86.0(5)   |
| O(59)-W(9)-O(61)      | 99.1(8)  | O(60)-W(8)-O(33)     | 86.0(5)   |

---

|                       |          |                       |          |
|-----------------------|----------|-----------------------|----------|
| O(59)-W(9)-O(58)      | 101.3(8) | O(29)-W(15)-O(32)     | 88.6(6)  |
| O(61)-W(9)-O(58)      | 159.6(7) | O(37)-W(17)-O(40)     | 104.3(8) |
| O(59)-W(9)-O(60)      | 100.6(7) | O(37)-W(17)-O(36)     | 92.0(6)  |
| O(61)-W(9)-O(60)      | 92.2(7)  | O(40)-W(17)-O(36)     | 99.9(6)  |
| O(58)-W(9)-O(60)      | 85.5(8)  | O(37)-W(17)-O(38)     | 94.7(7)  |
| O(59)-W(9)-O(57)      | 97.4(7)  | O(40)-W(17)-O(38)     | 97.5(7)  |
| O(61)-W(9)-O(57)      | 89.2(6)  | O(36)-W(17)-O(38)     | 159.2(7) |
| O(58)-W(9)-O(57)      | 86.8(7)  | O(37)-W(17)-O(41)#1   | 160.8(7) |
| O(60)-W(9)-O(57)      | 161.5(6) | O(40)-W(17)-O(41)#1   | 94.7(7)  |
| O(59)-W(9)-O(32)      | 169.1(7) | O(36)-W(17)-O(41)#1   | 81.3(6)  |
| O(61)-W(9)-O(32)      | 73.8(5)  | O(38)-W(17)-O(41)#1   | 86.0(7)  |
| O(58)-W(9)-O(32)      | 85.8(6)  | O(37)-W(17)-O(33)     | 88.4(7)  |
| O(60)-W(9)-O(32)      | 88.1(5)  | O(40)-W(17)-O(33)     | 165.7(7) |
| O(57)-W(9)-O(32)      | 74.6(5)  | O(36)-W(17)-O(33)     | 86.1(5)  |
| O(26)-W(10)-O(25)     | 102.6(6) | O(38)-W(17)-O(33)     | 74.5(6)  |
| O(26)-W(10)-O(25)#1   | 102.6(6) | O(41)#1-W(17)-O(33)   | 73.2(6)  |
| O(25)-W(10)-O(25)#1   | 97.1(10) | O(89)-Pr(1)-O(89)#1   | 139.5(7) |
| O(26)-W(10)-O(27)#1   | 96.9(7)  | O(89)-Pr(1)-O(53)     | 109.6(3) |
| O(25)-W(10)-O(27)#1   | 157.2(6) | O(89)#1-Pr(1)-O(53)   | 109.6(3) |
| O(25)#1-W(10)-O(27)#1 | 89.9(6)  | O(89)-Pr(1)-O(52)     | 71.0(3)  |
| O(26)-W(10)-O(27)     | 96.9(7)  | O(89)#1-Pr(1)-O(52)   | 71.0(3)  |
| O(25)-W(10)-O(27)     | 89.9(6)  | O(53)-Pr(1)-O(52)     | 146.0(7) |
| O(25)#1-W(10)-O(27)   | 157.2(6) | O(89)-Pr(1)-O(50)#1   | 117.0(5) |
| O(27)#1-W(10)-O(27)   | 76.0(7)  | O(89)#1-Pr(1)-O(50)#1 | 68.5(4)  |
| O(26)-W(10)-O(28)     | 176.2(8) | O(53)-Pr(1)-O(50)#1   | 70.1(5)  |
| O(25)-W(10)-O(28)     | 79.9(5)  | O(52)-Pr(1)-O(50)#1   | 79.4(6)  |
| O(25)#1-W(10)-O(28)   | 79.9(5)  | O(89)-Pr(1)-O(50)     | 68.5(4)  |
| O(27)#1-W(10)-O(28)   | 80.0(5)  | O(89)#1-Pr(1)-O(50)   | 117.0(5) |
| O(27)-W(10)-O(28)     | 80.0(5)  | O(53)-Pr(1)-O(50)     | 70.1(5)  |
| O(30)-W(15)-O(27)     | 102.6(7) | O(52)-Pr(1)-O(50)     | 79.4(6)  |
| O(30)-W(15)-O(57)     | 97.8(7)  | O(50)#1-Pr(1)-O(50)   | 51.8(6)  |
| O(27)-W(15)-O(57)     | 158.9(6) | O(89)-Pr(1)-O(83)     | 67.7(4)  |
| O(30)-W(15)-O(31)     | 101.4(7) | O(89)#1-Pr(1)-O(83)   | 138.9(4) |
| O(27)-W(15)-O(31)     | 91.8(6)  | O(53)-Pr(1)-O(83)     | 67.5(4)  |
| O(57)-W(15)-O(31)     | 89.5(6)  | O(52)-Pr(1)-O(83)     | 135.1(4) |
| O(30)-W(15)-O(29)     | 97.0(7)  | O(50)#1-Pr(1)-O(83)   | 135.7(4) |
| O(27)-W(15)-O(29)     | 86.6(7)  | O(50)-Pr(1)-O(83)     | 100.9(4) |
| O(57)-W(15)-O(29)     | 85.6(7)  | O(89)-Pr(1)-O(83)#1   | 138.9(4) |
| O(31)-W(15)-O(29)     | 161.4(7) | O(89)#1-Pr(1)-O(83)#1 | 67.7(4)  |
| O(30)-W(15)-O(32)     | 171.7(6) | O(53)-Pr(1)-O(83)#1   | 67.5(4)  |
| O(27)-W(15)-O(32)     | 83.7(6)  | O(52)-Pr(1)-O(83)#1   | 135.1(4) |
| O(57)-W(15)-O(32)     | 76.6(6)  | O(50)#1-Pr(1)-O(83)#1 | 100.9(4) |
| O(31)-W(15)-O(32)     | 72.8(6)  | O(50)-Pr(1)-O(83)#1   | 135.7(4) |
| O(89)-Pr(1)-O(51)     | 80.6(4)  | O(83)-Pr(1)-O(83)#1   | 74.3(5)  |

---

---

|                     |          |                    |           |
|---------------------|----------|--------------------|-----------|
| O(89)#1-Pr(1)-O(51) | 80.6(4)  | O(46)-Pr(2)-O(48)  | 69.8(5)   |
| O(53)-Pr(1)-O(51)   | 132.2(7) | O(49)-Pr(2)-O(48)  | 76.1(5)   |
| O(52)-Pr(1)-O(51)   | 81.8(8)  | O(42)-Pr(2)-O(48)  | 134.9(5)  |
| O(50)#1-Pr(1)-O(51) | 147.7(4) | O(43)-Pr(2)-O(48)  | 144.6(5)  |
| O(50)-Pr(1)-O(51)   | 147.7(4) | O(50)-Pr(2)-O(48)  | 78.1(5)   |
| O(83)-Pr(1)-O(51)   | 74.9(5)  | O(45)-Pr(2)-O(44)  | 70.4(4)   |
| O(83)#1-Pr(1)-O(51) | 74.9(5)  | O(46)-Pr(2)-O(44)  | 138.2(4)  |
| O(45)-Pr(2)-O(46)   | 136.5(5) | O(49)-Pr(2)-O(44)  | 103.5(5)  |
| O(45)-Pr(2)-O(49)   | 68.8(5)  | O(42)-Pr(2)-O(44)  | 72.6(4)   |
| O(46)-Pr(2)-O(49)   | 115.7(5) | O(43)-Pr(2)-O(44)  | 66.2(4)   |
| O(45)-Pr(2)-O(42)   | 138.7(4) | O(50)-Pr(2)-O(44)  | 135.6(4)  |
| O(46)-Pr(2)-O(42)   | 68.6(4)  | O(48)-Pr(2)-O(44)  | 137.2(5)  |
| O(49)-Pr(2)-O(42)   | 138.7(5) | O(45)-Pr(2)-O(47)  | 78.9(5)   |
| O(45)-Pr(2)-O(43)   | 110.0(4) | O(46)-Pr(2)-O(47)  | 78.5(5)   |
| O(46)-Pr(2)-O(43)   | 112.1(5) | O(49)-Pr(2)-O(47)  | 144.6(6)  |
| O(49)-Pr(2)-O(43)   | 71.5(5)  | O(42)-Pr(2)-O(47)  | 76.1(4)   |
| O(42)-Pr(2)-O(43)   | 69.5(4)  | O(43)-Pr(2)-O(47)  | 135.8(4)  |
| O(45)-Pr(2)-O(50)   | 117.1(5) | O(50)-Pr(2)-O(47)  | 145.2(5)  |
| O(46)-Pr(2)-O(50)   | 69.0(4)  | O(48)-Pr(2)-O(47)  | 79.6(5)   |
| O(49)-Pr(2)-O(50)   | 51.4(5)  | O(44)-Pr(2)-O(47)  | 77.8(4)   |
| O(42)-Pr(2)-O(50)   | 102.0(4) | O(49)-C(1)-O(50)   | 120.1(14) |
| O(43)-Pr(2)-O(50)   | 70.7(4)  | O(49)-C(1)-O(50)#1 | 120.1(14) |
| O(45)-Pr(2)-O(48)   | 69.9(5)  | O(50)-C(1)-O(50)#1 | 120(3)    |

---

Symmetry code for 1: # = x, -y, z.



Table S2. Selected bond lengths [Å] and bond angles (°) for the compound **2**.

|               |           |                     |           |
|---------------|-----------|---------------------|-----------|
| Bi(1)-O(32)#1 | 2.129(12) | W(10)-O(26)         | 1.71(2)   |
| Bi(1)-O(32)   | 2.129(11) | W(10)-O(25)         | 1.756(15) |
| Bi(1)-O(33)   | 2.132(15) | W(10)-O(25)#1       | 1.756(15) |
| Bi(2)-O(53)   | 2.167(16) | W(10)-O(27)#1       | 2.033(14) |
| Bi(2)-O(84)   | 2.208(17) | W(10)-O(27)         | 2.033(14) |
| Bi(2)-O(85)   | 2.361(11) | W(10)-O(28)         | 2.380(15) |
| Bi(2)-O(85)#1 | 2.361(11) | W(15)-O(30)         | 1.726(16) |
| Bi(2)-O(83)   | 2.694(10) | W(15)-O(27)         | 1.831(14) |
| Bi(2)-O(83)#1 | 2.694(10) | W(15)-O(31)         | 1.920(13) |
| Bi(4)-O(84)   | 2.114(9)  | W(15)-O(29)         | 1.926(5)  |
| Bi(4)-O(55)   | 2.193(11) | W(15)-O(57)         | 1.934(16) |
| Bi(4)-O(28)   | 2.326(11) | W(15)-O(32)         | 2.230(12) |
| Bi(4)-O(25)   | 2.441(12) | W(17)-O(37)         | 1.730(13) |
| Bi(4)-O(85)   | 2.538(12) | W(17)-O(40)         | 1.736(14) |
| Bi(4)-O(78)   | 2.668(11) | W(17)-O(36)         | 1.941(15) |
| Bi(5)-O(55)   | 2.115(11) | W(17)-O(38)         | 1.945(10) |
| Bi(5)-O(55)#1 | 2.115(11) | W(17)-O(41)#1       | 2.070(16) |
| Bi(5)-O(28)   | 2.219(17) | W(17)-O(33)         | 2.212(10) |
| Bi(7)-O(43)   | 2.149(10) | Nd(1)-O(89)         | 2.411(12) |
| Bi(7)-O(55)   | 2.164(12) | Nd(1)-O(89)#1       | 2.411(12) |
| Bi(7)-O(56)   | 2.292(13) | Nd(1)-O(53)         | 2.488(18) |
| Bi(7)-O(78)   | 2.317(12) | Nd(1)-O(83)         | 2.503(12) |
| Bi(7)-O(44)   | 2.662(12) | Nd(1)-O(83)#1       | 2.503(12) |
| Bi(7)-O(42)   | 2.748(11) | Nd(1)-O(51)         | 2.53(2)   |
| W(7)-O(34)    | 1.733(15) | Nd(1)-O(50)#1       | 2.536(13) |
| W(7)-O(35)    | 1.754(14) | Nd(1)-O(50)         | 2.536(13) |
| W(7)-O(36)    | 1.924(15) | Nd(1)-O(52)         | 2.546(17) |
| W(7)-O(31)    | 2.015(12) | Nd(2)-O(45)         | 2.392(13) |
| W(7)-O(61)    | 2.083(18) | Nd(2)-O(46)         | 2.430(14) |
| W(7)-O(32)    | 2.207(12) | Nd(2)-O(42)         | 2.471(13) |
| W(8)-O(62)    | 1.70(2)   | Nd(2)-O(48)         | 2.492(13) |
| W(8)-O(41)#1  | 1.872(14) | Nd(2)-O(43)         | 2.520(11) |
| W(8)-O(41)    | 1.872(14) | Nd(2)-O(49)         | 2.531(2)  |
| W(8)-O(60)    | 1.970(15) | Nd(2)-O(44)         | 2.536(14) |
| W(8)-O(60)#1  | 1.970(15) | Nd(2)-O(47)         | 2.541(13) |
| W(8)-O(33)    | 2.345(16) | Nd(2)-O(50)         | 2.549(13) |
| W(9)-O(59)    | 1.724(15) | O(49)-C(1)          | 1.22(3)   |
| W(9)-O(60)    | 1.855(15) | O(50)-C(1)          | 1.26(2)   |
| W(9)-O(61)    | 1.897(16) | O(32)#1-Bi(1)-O(32) | 85.4(7)   |
| W(9)-O(58)    | 1.918(5)  | O(32)#1-Bi(1)-O(33) | 87.3(5)   |
| W(9)-O(57)    | 1.961(15) | O(32)-Bi(1)-O(33)   | 87.3(5)   |
| W(9)-O(32)    | 2.286(12) | O(53)-Bi(2)-O(84)   | 84.4(7)   |

|                       |          |                      |          |
|-----------------------|----------|----------------------|----------|
| O(53)-Bi(2)-O(85)     | 88.1(3)  | O(56)-Bi(7)-O(42)    | 140.5(4) |
| O(84)-Bi(2)-O(85)     | 69.8(3)  | O(78)-Bi(7)-O(42)    | 71.6(4)  |
| O(53)-Bi(2)-O(85)#1   | 88.1(3)  | O(44)-Bi(7)-O(42)    | 67.0(4)  |
| O(84)-Bi(2)-O(85)#1   | 69.8(3)  | O(34)-W(7)-O(35)     | 105.0(8) |
| O(85)-Bi(2)-O(85)#1   | 139.6(6) | O(34)-W(7)-O(36)     | 93.1(6)  |
| O(53)-Bi(2)-O(83)     | 69.6(5)  | O(35)-W(7)-O(36)     | 100.4(6) |
| O(84)-Bi(2)-O(83)     | 134.9(4) | O(34)-W(7)-O(31)     | 93.1(6)  |
| O(85)-Bi(2)-O(83)     | 72.9(4)  | O(35)-W(7)-O(31)     | 96.1(6)  |
| O(85)#1-Bi(2)-O(83)   | 141.3(4) | O(36)-W(7)-O(31)     | 160.2(6) |
| O(53)-Bi(2)-O(83)#1   | 69.6(5)  | O(34)-W(7)-O(61)     | 160.2(6) |
| O(84)-Bi(2)-O(83)#1   | 134.9(4) | O(35)-W(7)-O(61)     | 94.8(7)  |
| O(85)-Bi(2)-O(83)#1   | 141.3(4) | O(36)-W(7)-O(61)     | 84.1(6)  |
| O(85)#1-Bi(2)-O(83)#1 | 72.9(4)  | O(31)-W(7)-O(61)     | 83.7(5)  |
| O(83)-Bi(2)-O(83)#1   | 69.8(5)  | O(34)-W(7)-O(32)     | 87.4(6)  |
| O(84)-Bi(4)-O(55)     | 90.8(6)  | O(35)-W(7)-O(32)     | 164.4(6) |
| O(84)-Bi(4)-O(28)     | 71.4(5)  | O(36)-W(7)-O(32)     | 88.0(5)  |
| O(55)-Bi(4)-O(28)     | 72.8(5)  | O(31)-W(7)-O(32)     | 73.5(5)  |
| O(84)-Bi(4)-O(25)     | 91.7(6)  | O(61)-W(7)-O(32)     | 72.9(5)  |
| O(55)-Bi(4)-O(25)     | 139.1(4) | O(62)-W(8)-O(41)#1   | 102.4(7) |
| O(28)-Bi(4)-O(25)     | 69.5(5)  | O(62)-W(8)-O(41)     | 102.4(7) |
| O(84)-Bi(4)-O(85)     | 67.8(5)  | O(41)#1-W(8)-O(41)   | 96.6(9)  |
| O(55)-Bi(4)-O(85)     | 110.3(4) | O(62)-W(8)-O(60)     | 97.7(7)  |
| O(28)-Bi(4)-O(85)     | 139.0(4) | O(41)#1-W(8)-O(60)   | 87.0(6)  |
| O(25)-Bi(4)-O(85)     | 108.4(4) | O(41)-W(8)-O(60)     | 158.3(6) |
| O(84)-Bi(4)-O(78)     | 111.6(5) | O(62)-W(8)-O(60)#1   | 97.7(7)  |
| O(55)-Bi(4)-O(78)     | 65.0(4)  | O(41)#1-W(8)-O(60)#1 | 158.3(6) |
| O(28)-Bi(4)-O(78)     | 137.6(5) | O(41)-W(8)-O(60)#1   | 87.0(6)  |
| O(25)-Bi(4)-O(78)     | 148.0(4) | O(60)-W(8)-O(60)#1   | 82.1(8)  |
| O(85)-Bi(4)-O(78)     | 64.3(4)  | O(62)-W(8)-O(33)     | 175.0(8) |
| O(55)-Bi(5)-O(55)#1   | 89.6(7)  | O(41)#1-W(8)-O(33)   | 74.5(5)  |
| O(55)-Bi(5)-O(28)     | 76.4(4)  | O(41)-W(8)-O(33)     | 74.5(5)  |
| O(55)#1-Bi(5)-O(28)   | 76.4(4)  | O(60)-W(8)-O(33)     | 86.0(5)  |
| O(43)-Bi(7)-O(55)     | 83.6(4)  | O(60)#1-W(8)-O(33)   | 86.0(5)  |
| O(43)-Bi(7)-O(56)     | 90.8(5)  | O(59)-W(9)-O(60)     | 101.7(7) |
| O(55)-Bi(7)-O(56)     | 72.4(4)  | O(59)-W(9)-O(61)     | 99.4(8)  |
| O(43)-Bi(7)-O(78)     | 88.3(5)  | O(60)-W(9)-O(61)     | 90.9(6)  |
| O(55)-Bi(7)-O(78)     | 72.2(4)  | O(59)-W(9)-O(58)     | 100.2(9) |
| O(56)-Bi(7)-O(78)     | 144.4(4) | O(60)-W(9)-O(58)     | 88.0(7)  |
| O(43)-Bi(7)-O(44)     | 71.4(4)  | O(61)-W(9)-O(58)     | 160.2(8) |
| O(55)-Bi(7)-O(44)     | 137.5(4) | O(59)-W(9)-O(57)     | 96.6(7)  |
| O(56)-Bi(7)-O(44)     | 74.2(4)  | O(60)-W(9)-O(57)     | 161.3(6) |
| O(78)-Bi(7)-O(44)     | 137.9(4) | O(61)-W(9)-O(57)     | 90.0(6)  |
| O(43)-Bi(7)-O(42)     | 70.4(4)  | O(58)-W(9)-O(57)     | 84.9(7)  |
| O(55)-Bi(7)-O(42)     | 135.5(4) | O(59)-W(9)-O(32)     | 167.9(7) |

---

|                       |          |                       |          |
|-----------------------|----------|-----------------------|----------|
| O(60)-W(9)-O(32)      | 89.0(5)  | O(37)-W(17)-O(33)     | 89.0(6)  |
| O(61)-W(9)-O(32)      | 74.5(6)  | O(40)-W(17)-O(33)     | 166.4(6) |
| O(58)-W(9)-O(32)      | 85.8(7)  | O(36)-W(17)-O(33)     | 86.5(5)  |
| O(57)-W(9)-O(32)      | 73.2(5)  | O(38)-W(17)-O(33)     | 73.0(5)  |
| O(26)-W(10)-O(25)     | 101.6(6) | O(41)#1-W(17)-O(33)   | 74.0(5)  |
| O(26)-W(10)-O(25)#1   | 101.6(6) | O(89)-Nd(1)-O(89)#1   | 140.2(6) |
| O(25)-W(10)-O(25)#1   | 98.1(11) | O(89)-Nd(1)-O(53)     | 109.4(3) |
| O(26)-W(10)-O(27)#1   | 96.3(7)  | O(89)#1-Nd(1)-O(53)   | 109.4(3) |
| O(25)-W(10)-O(27)#1   | 158.9(6) | O(89)-Nd(1)-O(83)     | 66.0(4)  |
| O(25)#1-W(10)-O(27)#1 | 89.2(7)  | O(89)#1-Nd(1)-O(83)   | 138.6(4) |
| O(26)-W(10)-O(27)     | 96.3(7)  | O(53)-Nd(1)-O(83)     | 68.5(4)  |
| O(25)-W(10)-O(27)     | 89.2(7)  | O(89)-Nd(1)-O(83)#1   | 138.6(4) |
| O(25)#1-W(10)-O(27)   | 158.9(6) | O(89)#1-Nd(1)-O(83)#1 | 66.0(4)  |
| O(27)#1-W(10)-O(27)   | 77.7(8)  | O(53)-Nd(1)-O(83)#1   | 68.5(4)  |
| O(26)-W(10)-O(28)     | 176.6(8) | O(83)-Nd(1)-O(83)#1   | 76.0(5)  |
| O(25)-W(10)-O(28)     | 80.6(5)  | O(89)-Nd(1)-O(51)     | 79.8(4)  |
| O(25)#1-W(10)-O(28)   | 80.6(5)  | O(89)#1-Nd(1)-O(51)   | 79.8(4)  |
| O(27)#1-W(10)-O(28)   | 81.1(5)  | O(53)-Nd(1)-O(51)     | 133.3(6) |
| O(27)-W(10)-O(28)     | 81.1(5)  | O(83)-Nd(1)-O(51)     | 75.2(4)  |
| O(30)-W(15)-O(27)     | 101.1(7) | O(83)#1-Nd(1)-O(51)   | 75.2(4)  |
| O(30)-W(15)-O(31)     | 99.8(6)  | O(89)-Nd(1)-O(50)#1   | 117.1(4) |
| O(27)-W(15)-O(31)     | 91.9(6)  | O(89)#1-Nd(1)-O(50)#1 | 70.5(5)  |
| O(30)-W(15)-O(29)     | 97.8(6)  | O(53)-Nd(1)-O(50)#1   | 69.0(5)  |
| O(27)-W(15)-O(29)     | 86.1(6)  | O(83)-Nd(1)-O(50)#1   | 135.1(4) |
| O(31)-W(15)-O(29)     | 162.4(6) | O(83)#1-Nd(1)-O(50)#1 | 101.1(4) |
| O(30)-W(15)-O(57)     | 100.7(7) | O(51)-Nd(1)-O(50)#1   | 148.5(4) |
| O(27)-W(15)-O(57)     | 157.8(6) | O(89)-Nd(1)-O(50)     | 70.5(5)  |
| O(31)-W(15)-O(57)     | 89.0(6)  | O(89)#1-Nd(1)-O(50)   | 117.1(4) |
| O(29)-W(15)-O(57)     | 86.4(6)  | O(53)-Nd(1)-O(50)     | 69.0(5)  |
| O(30)-W(15)-O(32)     | 173.0(6) | O(83)-Nd(1)-O(50)     | 101.1(4) |
| O(27)-W(15)-O(32)     | 83.8(5)  | O(83)#1-Nd(1)-O(50)   | 135.1(4) |
| O(31)-W(15)-O(32)     | 74.8(5)  | O(51)-Nd(1)-O(50)     | 148.5(4) |
| O(29)-W(15)-O(32)     | 87.6(5)  | O(50)#1-Nd(1)-O(50)   | 49.6(6)  |
| O(57)-W(15)-O(32)     | 75.0(5)  | O(89)-Nd(1)-O(52)     | 71.7(3)  |
| O(37)-W(17)-O(40)     | 102.3(6) | O(89)#1-Nd(1)-O(52)   | 71.7(3)  |
| O(37)-W(17)-O(36)     | 94.0(6)  | O(53)-Nd(1)-O(52)     | 145.3(6) |
| O(40)-W(17)-O(36)     | 100.0(6) | O(83)-Nd(1)-O(52)     | 134.3(3) |
| O(37)-W(17)-O(38)     | 94.5(7)  | O(83)#1-Nd(1)-O(52)   | 134.3(3) |
| O(40)-W(17)-O(38)     | 98.3(7)  | O(51)-Nd(1)-O(52)     | 81.4(7)  |
| O(36)-W(17)-O(38)     | 157.6(7) | O(50)#1-Nd(1)-O(52)   | 79.6(5)  |
| O(37)-W(17)-O(41)#1   | 162.8(5) | O(50)-Nd(1)-O(52)     | 79.6(5)  |
| O(40)-W(17)-O(41)#1   | 94.9(6)  | O(45)-Nd(2)-O(46)     | 137.9(4) |
| O(36)-W(17)-O(41)#1   | 82.7(6)  | O(45)-Nd(2)-O(42)     | 137.9(4) |
| O(38)-W(17)-O(41)#1   | 83.0(7)  | O(46)-Nd(2)-O(42)     | 67.7(4)  |

---

---

|                   |          |                    |           |
|-------------------|----------|--------------------|-----------|
| O(45)-Nd(2)-O(48) | 70.6(5)  | O(45)-Nd(2)-O(47)  | 80.3(4)   |
| O(46)-Nd(2)-O(48) | 70.6(4)  | O(46)-Nd(2)-O(47)  | 77.7(4)   |
| O(42)-Nd(2)-O(48) | 134.7(4) | O(42)-Nd(2)-O(47)  | 74.1(4)   |
| O(45)-Nd(2)-O(43) | 110.2(4) | O(48)-Nd(2)-O(47)  | 80.5(5)   |
| O(46)-Nd(2)-O(43) | 110.8(4) | O(43)-Nd(2)-O(47)  | 135.5(4)  |
| O(42)-Nd(2)-O(43) | 70.0(4)  | O(49)-Nd(2)-O(47)  | 146.5(5)  |
| O(48)-Nd(2)-O(43) | 143.9(4) | O(44)-Nd(2)-O(47)  | 76.9(4)   |
| O(45)-Nd(2)-O(49) | 68.9(5)  | O(45)-Nd(2)-O(50)  | 116.6(4)  |
| O(46)-Nd(2)-O(49) | 117.1(5) | O(46)-Nd(2)-O(50)  | 70.5(4)   |
| O(42)-Nd(2)-O(49) | 138.5(5) | O(42)-Nd(2)-O(50)  | 102.9(4)  |
| O(48)-Nd(2)-O(49) | 77.2(5)  | O(48)-Nd(2)-O(50)  | 78.7(4)   |
| O(43)-Nd(2)-O(49) | 70.3(5)  | O(43)-Nd(2)-O(50)  | 68.8(4)   |
| O(45)-Nd(2)-O(44) | 68.7(4)  | O(49)-Nd(2)-O(50)  | 50.7(5)   |
| O(46)-Nd(2)-O(44) | 137.8(4) | O(44)-Nd(2)-O(50)  | 135.4(4)  |
| O(42)-Nd(2)-O(44) | 73.2(4)  | O(47)-Nd(2)-O(50)  | 146.3(5)  |
| O(48)-Nd(2)-O(44) | 136.0(4) | O(49)-C(1)-O(50)   | 122.2(13) |
| O(43)-Nd(2)-O(44) | 68.3(4)  | O(49)-C(1)-O(50)#1 | 122.2(13) |
| O(49)-Nd(2)-O(44) | 102.6(5) | O(50)-C(1)-O(50)#1 | 115(3)    |

---

Symmetry code for 2: # = x, -y, z.

Table S3. Selected bond lengths [Å] and bond angles (°) for the compound **3**.

|               |           |                     |           |
|---------------|-----------|---------------------|-----------|
| Bi(1)-O(32)#1 | 2.143(14) | W(10)-O(25)#1       | 1.72(2)   |
| Bi(1)-O(32)   | 2.143(14) | W(10)-O(25)         | 1.72(2)   |
| Bi(1)-O(33)   | 2.15(2)   | W(10)-O(27)#1       | 2.02(2)   |
| Bi(2)-O(53)   | 2.147(19) | W(10)-O(27)         | 2.02(2)   |
| Bi(2)-O(84)   | 2.17(2)   | W(10)-O(28)         | 2.37(2)   |
| Bi(2)-O(85)#1 | 2.351(17) | W(15)-O(30)         | 1.60(3)   |
| Bi(2)-O(85)   | 2.351(16) | W(15)-O(27)         | 1.86(2)   |
| Bi(2)-O(83)#1 | 2.681(17) | W(15)-O(57)         | 1.88(2)   |
| Bi(2)-O(83)   | 2.681(17) | W(15)-O(31)         | 1.919(18) |
| Bi(4)-O(84)   | 2.133(13) | W(15)-O(29)         | 1.924(7)  |
| Bi(4)-O(55)   | 2.217(13) | W(15)-O(32)         | 2.231(17) |
| Bi(4)-O(28)   | 2.314(16) | W(17)-O(37)         | 1.66(3)   |
| Bi(4)-O(25)   | 2.49(2)   | W(17)-O(40)         | 1.73(2)   |
| Bi(4)-O(85)   | 2.573(19) | W(17)-O(36)         | 1.93(2)   |
| Bi(4)-O(78)   | 2.691(16) | W(17)-O(38)         | 1.961(14) |
| Bi(5)-O(55)#1 | 2.099(16) | W(17)-O(41)#1       | 2.08(2)   |
| Bi(5)-O(55)   | 2.099(16) | W(17)-O(33)         | 2.206(14) |
| Bi(5)-O(28)   | 2.24(2)   | La(1)-O(89)#1       | 2.525(19) |
| Bi(7)-O(43)   | 2.15(2)   | La(1)-O(89)         | 2.525(19) |
| Bi(7)-O(55)   | 2.160(14) | La(1)-O(53)         | 2.55(3)   |
| Bi(7)-O(78)   | 2.307(16) | La(1)-O(52)         | 2.56(3)   |
| Bi(7)-O(56)   | 2.354(19) | La(1)-O(50)#1       | 2.569(17) |
| Bi(7)-O(44)   | 2.703(14) | La(1)-O(50)         | 2.569(17) |
| W(7)-O(34)    | 1.67(2)   | La(1)-O(51)         | 2.59(3)   |
| W(7)-O(35)    | 1.72(2)   | La(1)-O(83)         | 2.601(17) |
| W(7)-O(36)    | 1.92(2)   | La(1)-O(83)#1       | 2.601(17) |
| W(7)-O(31)    | 2.01(2)   | La(2)-O(46)         | 2.47(2)   |
| W(7)-O(61)    | 2.05(2)   | La(2)-O(45)         | 2.52(2)   |
| W(7)-O(32)    | 2.156(16) | La(2)-O(43)         | 2.546(17) |
| W(8)-O(62)    | 1.65(4)   | La(2)-O(42)         | 2.553(17) |
| W(8)-O(41)    | 1.810(19) | La(2)-O(48)         | 2.55(2)   |
| W(8)-O(41)#1  | 1.810(19) | La(2)-O(49)         | 2.572(4)  |
| W(8)-O(60)#1  | 1.95(2)   | La(2)-O(50)         | 2.604(17) |
| W(8)-O(60)    | 1.95(2)   | La(2)-O(44)         | 2.62(2)   |
| W(8)-O(33)    | 2.33(2)   | La(2)-O(47)         | 2.641(18) |
| W(9)-O(59)    | 1.65(3)   | O(49)-C(1)          | 1.24(4)   |
| W(9)-O(61)    | 1.87(2)   | O(50)-C(1)          | 1.24(2)   |
| W(9)-O(60)    | 1.87(2)   | O(32)#1-Bi(1)-O(32) | 88.2(9)   |
| W(9)-O(58)    | 1.914(7)  | O(32)#1-Bi(1)-O(33) | 87.3(6)   |
| W(9)-O(57)    | 2.00(2)   | O(32)-Bi(1)-O(33)   | 87.3(6)   |
| W(9)-O(32)    | 2.295(17) | O(53)-Bi(2)-O(84)   | 84.3(9)   |
| W(10)-O(26)   | 1.68(3)   | O(53)-Bi(2)-O(85)#1 | 88.8(5)   |

---

|                       |           |                      |           |
|-----------------------|-----------|----------------------|-----------|
| O(84)-Bi(2)-O(85)#1   | 70.8(5)   | O(34)-W(7)-O(31)     | 93.9(8)   |
| O(53)-Bi(2)-O(85)     | 88.8(5)   | O(35)-W(7)-O(31)     | 94.4(8)   |
| O(84)-Bi(2)-O(85)     | 70.8(5)   | O(36)-W(7)-O(31)     | 160.2(7)  |
| O(85)#1-Bi(2)-O(85)   | 141.5(10) | O(34)-W(7)-O(61)     | 158.6(8)  |
| O(53)-Bi(2)-O(83)#1   | 71.7(7)   | O(35)-W(7)-O(61)     | 97.2(11)  |
| O(84)-Bi(2)-O(83)#1   | 135.8(5)  | O(36)-W(7)-O(61)     | 86.0(8)   |
| O(85)#1-Bi(2)-O(83)#1 | 72.1(6)   | O(31)-W(7)-O(61)     | 81.9(8)   |
| O(85)-Bi(2)-O(83)#1   | 142.1(6)  | O(34)-W(7)-O(32)     | 87.1(7)   |
| O(53)-Bi(2)-O(83)     | 71.7(7)   | O(35)-W(7)-O(32)     | 164.1(8)  |
| O(84)-Bi(2)-O(83)     | 135.8(5)  | O(36)-W(7)-O(32)     | 88.1(7)   |
| O(85)#1-Bi(2)-O(83)   | 142.1(6)  | O(31)-W(7)-O(32)     | 73.2(7)   |
| O(85)-Bi(2)-O(83)     | 72.1(6)   | O(61)-W(7)-O(32)     | 71.6(7)   |
| O(83)#1-Bi(2)-O(83)   | 71.0(7)   | O(62)-W(8)-O(41)     | 101.4(10) |
| O(84)-Bi(4)-O(55)     | 90.5(7)   | O(62)-W(8)-O(41)#1   | 101.4(10) |
| O(84)-Bi(4)-O(28)     | 71.8(7)   | O(41)-W(8)-O(41)#1   | 97.1(11)  |
| O(55)-Bi(4)-O(28)     | 72.9(6)   | O(62)-W(8)-O(60)#1   | 100.4(11) |
| O(84)-Bi(4)-O(25)     | 91.0(7)   | O(41)-W(8)-O(60)#1   | 86.3(9)   |
| O(55)-Bi(4)-O(25)     | 139.1(7)  | O(41)#1-W(8)-O(60)#1 | 156.8(10) |
| O(28)-Bi(4)-O(25)     | 68.8(7)   | O(62)-W(8)-O(60)     | 100.4(11) |
| O(84)-Bi(4)-O(85)     | 66.9(7)   | O(41)-W(8)-O(60)     | 156.8(10) |
| O(55)-Bi(4)-O(85)     | 110.8(6)  | O(41)#1-W(8)-O(60)   | 86.3(9)   |
| O(28)-Bi(4)-O(85)     | 138.6(6)  | O(60)#1-W(8)-O(60)   | 82.0(12)  |
| O(25)-Bi(4)-O(85)     | 107.3(7)  | O(62)-W(8)-O(33)     | 172.4(13) |
| O(84)-Bi(4)-O(78)     | 110.2(6)  | O(41)-W(8)-O(33)     | 73.7(7)   |
| O(55)-Bi(4)-O(78)     | 65.0(5)   | O(41)#1-W(8)-O(33)   | 73.7(7)   |
| O(28)-Bi(4)-O(78)     | 137.8(6)  | O(60)#1-W(8)-O(33)   | 85.3(8)   |
| O(25)-Bi(4)-O(78)     | 149.4(6)  | O(60)-W(8)-O(33)     | 85.3(8)   |
| O(85)-Bi(4)-O(78)     | 64.5(5)   | O(59)-W(9)-O(61)     | 99.7(11)  |
| O(55)#1-Bi(5)-O(55)   | 89.0(10)  | O(59)-W(9)-O(60)     | 101.4(11) |
| O(55)#1-Bi(5)-O(28)   | 76.6(6)   | O(61)-W(9)-O(60)     | 92.2(9)   |
| O(55)-Bi(5)-O(28)     | 76.6(6)   | O(59)-W(9)-O(58)     | 100.1(12) |
| O(43)-Bi(7)-O(55)     | 84.5(7)   | O(61)-W(9)-O(58)     | 160.1(10) |
| O(43)-Bi(7)-O(78)     | 88.3(7)   | O(60)-W(9)-O(58)     | 86.1(11)  |
| O(55)-Bi(7)-O(78)     | 73.2(6)   | O(59)-W(9)-O(57)     | 98.8(10)  |
| O(43)-Bi(7)-O(56)     | 92.5(7)   | O(61)-W(9)-O(57)     | 87.0(8)   |
| O(55)-Bi(7)-O(56)     | 72.5(5)   | O(60)-W(9)-O(57)     | 159.6(8)  |
| O(78)-Bi(7)-O(56)     | 145.4(6)  | O(58)-W(9)-O(57)     | 87.8(10)  |
| O(43)-Bi(7)-O(44)     | 71.5(6)   | O(59)-W(9)-O(32)     | 167.5(9)  |
| O(55)-Bi(7)-O(44)     | 136.6(5)  | O(61)-W(9)-O(32)     | 71.7(7)   |
| O(78)-Bi(7)-O(44)     | 138.7(6)  | O(60)-W(9)-O(32)     | 88.2(8)   |
| O(56)-Bi(7)-O(44)     | 73.1(5)   | O(58)-W(9)-O(32)     | 88.4(9)   |
| O(34)-W(7)-O(35)      | 104.0(11) | O(57)-W(9)-O(32)     | 72.2(7)   |
| O(34)-W(7)-O(36)      | 91.7(9)   | O(26)-W(10)-O(25)#1  | 100.1(9)  |
| O(35)-W(7)-O(36)      | 102.7(9)  | O(26)-W(10)-O(25)    | 100.1(9)  |

---

---

|                       |           |                       |          |
|-----------------------|-----------|-----------------------|----------|
| O(25)#1-W(10)-O(25)   | 95.1(15)  | O(89)#1-La(1)-O(53)   | 108.5(5) |
| O(26)-W(10)-O(27)#1   | 95.5(9)   | O(89)-La(1)-O(53)     | 108.5(5) |
| O(25)#1-W(10)-O(27)#1 | 92.2(9)   | O(89)#1-La(1)-O(52)   | 72.3(4)  |
| O(25)-W(10)-O(27)#1   | 161.3(8)  | O(89)-La(1)-O(52)     | 72.3(4)  |
| O(26)-W(10)-O(27)     | 95.5(9)   | O(53)-La(1)-O(52)     | 146.2(9) |
| O(25)#1-W(10)-O(27)   | 161.3(8)  | O(89)#1-La(1)-O(50)#1 | 70.1(5)  |
| O(25)-W(10)-O(27)     | 92.2(9)   | O(89)-La(1)-O(50)#1   | 115.6(5) |
| O(27)#1-W(10)-O(27)   | 76.0(9)   | O(53)-La(1)-O(50)#1   | 70.1(6)  |
| O(26)-W(10)-O(28)     | 177.5(12) | O(52)-La(1)-O(50)#1   | 79.1(9)  |
| O(25)#1-W(10)-O(28)   | 81.5(8)   | O(89)#1-La(1)-O(50)   | 115.6(5) |
| O(25)-W(10)-O(28)     | 81.5(8)   | O(89)-La(1)-O(50)     | 70.1(5)  |
| O(27)#1-W(10)-O(28)   | 82.5(7)   | O(53)-La(1)-O(50)     | 70.1(6)  |
| O(27)-W(10)-O(28)     | 82.5(7)   | O(52)-La(1)-O(50)     | 79.1(9)  |
| O(30)-W(15)-O(27)     | 104.7(10) | O(50)#1-La(1)-O(50)   | 48.3(7)  |
| O(30)-W(15)-O(57)     | 98.1(10)  | O(89)#1-La(1)-O(51)   | 80.5(5)  |
| O(27)-W(15)-O(57)     | 156.9(8)  | O(89)-La(1)-O(51)     | 80.5(5)  |
| O(30)-W(15)-O(31)     | 98.4(9)   | O(53)-La(1)-O(51)     | 133.5(8) |
| O(27)-W(15)-O(31)     | 92.1(7)   | O(52)-La(1)-O(51)     | 80.3(11) |
| O(57)-W(15)-O(31)     | 87.9(8)   | O(50)#1-La(1)-O(51)   | 148.0(6) |
| O(30)-W(15)-O(29)     | 100.3(10) | O(50)-La(1)-O(51)     | 148.0(6) |
| O(27)-W(15)-O(29)     | 85.5(9)   | O(89)#1-La(1)-O(83)   | 137.7(5) |
| O(57)-W(15)-O(29)     | 87.2(10)  | O(89)-La(1)-O(83)     | 66.9(5)  |
| O(31)-W(15)-O(29)     | 161.1(9)  | O(53)-La(1)-O(83)     | 67.4(5)  |
| O(30)-W(15)-O(32)     | 169.6(9)  | O(52)-La(1)-O(83)     | 135.2(6) |
| O(27)-W(15)-O(32)     | 82.1(7)   | O(50)#1-La(1)-O(83)   | 135.2(6) |
| O(57)-W(15)-O(32)     | 75.8(7)   | O(50)-La(1)-O(83)     | 102.7(5) |
| O(31)-W(15)-O(32)     | 73.1(7)   | O(51)-La(1)-O(83)     | 75.8(7)  |
| O(29)-W(15)-O(32)     | 88.0(8)   | O(89)#1-La(1)-O(83)#1 | 66.9(5)  |
| O(37)-W(17)-O(40)     | 105.3(10) | O(89)-La(1)-O(83)#1   | 137.7(5) |
| O(37)-W(17)-O(36)     | 93.9(9)   | O(53)-La(1)-O(83)#1   | 67.4(5)  |
| O(40)-W(17)-O(36)     | 99.5(8)   | O(52)-La(1)-O(83)#1   | 135.2(6) |
| O(37)-W(17)-O(38)     | 92.9(10)  | O(50)#1-La(1)-O(83)#1 | 102.7(5) |
| O(40)-W(17)-O(38)     | 97.5(9)   | O(50)-La(1)-O(83)#1   | 135.2(6) |
| O(36)-W(17)-O(38)     | 159.3(8)  | O(51)-La(1)-O(83)#1   | 75.8(7)  |
| O(37)-W(17)-O(41)#1   | 160.3(8)  | O(83)-La(1)-O(83)#1   | 73.5(6)  |
| O(40)-W(17)-O(41)#1   | 94.4(10)  | O(46)-La(2)-O(45)     | 140.9(6) |
| O(36)-W(17)-O(41)#1   | 82.9(8)   | O(46)-La(2)-O(43)     | 110.5(6) |
| O(38)-W(17)-O(41)#1   | 84.1(9)   | O(45)-La(2)-O(43)     | 107.9(6) |
| O(37)-W(17)-O(33)     | 88.6(8)   | O(46)-La(2)-O(42)     | 66.1(6)  |
| O(40)-W(17)-O(33)     | 164.2(10) | O(45)-La(2)-O(42)     | 137.2(6) |
| O(36)-W(17)-O(33)     | 86.7(7)   | O(43)-La(2)-O(42)     | 69.7(5)  |
| O(38)-W(17)-O(33)     | 74.0(7)   | O(46)-La(2)-O(48)     | 71.2(7)  |
| O(41)#1-W(17)-O(33)   | 71.9(8)   | O(45)-La(2)-O(48)     | 73.4(8)  |
| O(89)#1-La(1)-O(89)   | 142.0(9)  | O(43)-La(2)-O(48)     | 143.9(7) |

---

---

|                   |          |                    |           |
|-------------------|----------|--------------------|-----------|
| O(42)-La(2)-O(48) | 134.2(7) | O(42)-La(2)-O(44)  | 75.0(5)   |
| O(46)-La(2)-O(49) | 117.2(7) | O(48)-La(2)-O(44)  | 136.2(6)  |
| O(45)-La(2)-O(49) | 70.0(7)  | O(49)-La(2)-O(44)  | 101.6(7)  |
| O(43)-La(2)-O(49) | 69.6(7)  | O(50)-La(2)-O(44)  | 135.0(5)  |
| O(42)-La(2)-O(49) | 137.0(6) | O(46)-La(2)-O(47)  | 79.1(7)   |
| O(48)-La(2)-O(49) | 77.7(7)  | O(45)-La(2)-O(47)  | 79.6(6)   |
| O(46)-La(2)-O(50) | 71.0(6)  | O(43)-La(2)-O(47)  | 134.4(7)  |
| O(45)-La(2)-O(50) | 116.8(6) | O(42)-La(2)-O(47)  | 75.0(6)   |
| O(43)-La(2)-O(50) | 69.8(6)  | O(48)-La(2)-O(47)  | 81.6(7)   |
| O(42)-La(2)-O(50) | 102.7(5) | O(49)-La(2)-O(47)  | 147.0(7)  |
| O(48)-La(2)-O(50) | 77.6(6)  | O(50)-La(2)-O(47)  | 147.7(7)  |
| O(49)-La(2)-O(50) | 49.5(7)  | O(44)-La(2)-O(47)  | 76.3(7)   |
| O(46)-La(2)-O(44) | 138.1(5) | O(50)#1-C(1)-O(50) | 116(3)    |
| O(45)-La(2)-O(44) | 65.7(6)  | O(50)#1-C(1)-O(49) | 121.8(15) |
| O(43)-La(2)-O(44) | 67.4(6)  | O(50)-C(1)-O(49)   | 121.8(15) |

---

Symmetry code for 3: # = x, -y, z.
